# Supplementary material for: Ophthalmic Bimatoprost-Loaded Niosomal In Situ Gel: Preparation, Optimization, and In Vivo Pharmacodynamics Study
Source: MDPI journal article supplement (doi:10.3390/polym15214336), 2023-11-06
Supplement: s1 [file s1]

Figure S1. Calibration curve for UV-Visible spectrophotometric determination of BMT ( $\lambda_{\text{max}} = 294 \text{ nm}$ )

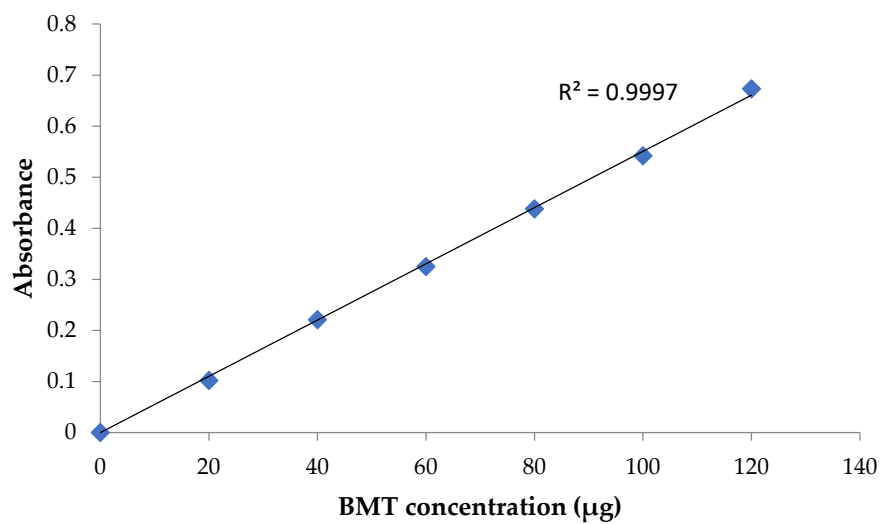

Figure S2: FTIR spectra of pure BMT, cholesterol, Span 60, and optimized BMT-loaded niosomes

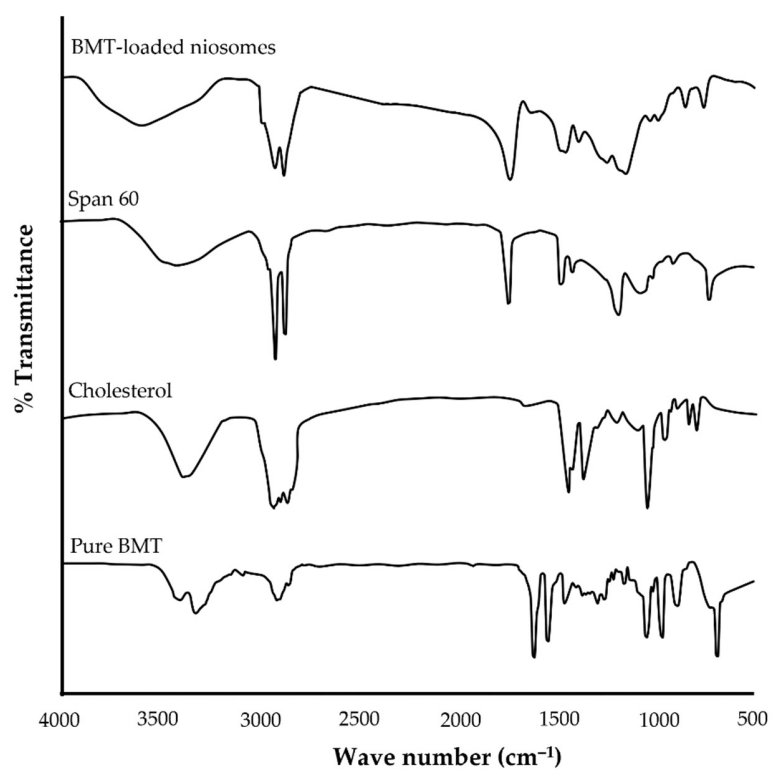

Table S1. Results of statistical analysis of all dependent variables

| Source                              | Y <sub>1</sub> |         | Y <sub>2</sub> |          |
|-------------------------------------|----------------|---------|----------------|----------|
|                                     | F-Value        | p-Value | F-Value        | p-Value  |
| Model                               | 386.25         | <0.0001 | 53.60          | < 0.0001 |
| X <sub>1</sub> : Drug Concentration | 429.84         | <0.0001 | 96.01          | <0.0001  |
| X <sub>2</sub> : Chol:SAA ratio     | 1487.56        | <0.0001 | 76.04          | <0.0001  |
| Lack of Fit                         | 5.91           | 0.0595  | 6.88           | 0.0373   |
| R <sup>2</sup> analysis             |                |         |                |          |
| R <sup>2</sup>                      | 0.9964         |         | 0.9745         |          |
| Adjusted R <sup>2</sup>             | 0.9938         |         | 0.9564         |          |
| Predicted R <sup>2</sup>            | 0.9780         |         | 0.9042         |          |
| Adequate precision                  | 61.72          |         | 26.56          |          |

Table S2. Stability study results of BMT-loaded niosomes stored at 4 °C for 90 days

| Evaluation parameters     | Day 0        | Day 30       | Day 90       |
|---------------------------|--------------|--------------|--------------|
| Vesicle size (nm)         | 167.3 ± 9.1  | 174.7 ± 11.1 | 180.2 ± 8.7  |
| Zeta potential (mV)       | − 12.4 ± 1.9 | − 12.1 ± 0.9 | − 11.5 ± 1.2 |
| Entrapment efficiency (%) | 81.2 ± 1.2   | 79.4 ± 2.4   | 77.3 ± 3.9   |

Table S3. Kinetic analysis of the *in vitro* release data of BMT from different BMT formulations

| Formula             | Zero-order | First-order | Higuchi-diffusion | Korsmeyer-Peppas | n     |
|---------------------|------------|-------------|-------------------|------------------|-------|
|                     |            |             | r <sup>2</sup>    |                  |       |
| Pure BMT            | 0.851      | 0.775       | 0.933             | 0.957            | --    |
| BMT-loaded niosomes | 0.846      | 0.637       | 0.977             | 0.974            | 0.627 |
| BMT-ISG             | 0.899      | 0.650       | 0.983             | 0.978            | 0.785 |
